# Supplementary material for: The long shadow of child labour on adolescent mental health: a quantile approach
Source: Springer Nature journal article supplement (doi:10.1007/s00181-022-02241-5), 2022-05-02
Supplement: MOESM1 [file 20363758]

## Supplementary Materials

Table S1: The 10-item Centre for Epidemiological Studies Depression Scale (CES-D) - Questionnaire

1. I was bothered by things that usually don't bother me
2. I had trouble concentrating in what I was doing
3. I felt depressed
4. I felt everything I did was an effort
5. I felt hopeful about the future
6. I felt fearful
7. My sleep was restless
8. I was happy
9. I felt lonely
10. I could not get going

All questions include four response categories. (1) Rarely or none of the time (less than 1 day), (2) Some or little of the time (1-2 days), (3) Occasionally or a moderate amount of time (3-4 days), and (4) Most or all of the time (5 to 7 days). The responses are assigned a score of 0, 1, 2 and 3 respectively. The scores of questions 5 and 8 are reversed (i.e. 3, 2, 1 and 0 respectively).

Table S2: Distribution of age at which children started to work

| Age started to work | Frequency | Percent | Cumulative |
|---------------------|-----------|---------|------------|
| 4                   | 1         | 0.33    | 0.33       |
| 5                   | 6         | 1.96    | 2.29       |
| 6                   | 10        | 3.27    | 5.56       |
| 7                   | 23        | 7.52    | 13.07      |
| 8                   | 41        | 13.4    | 26.47      |
| 9                   | 49        | 16.01   | 42.48      |
| 10                  | 68        | 22.22   | 64.71      |
| 11                  | 29        | 9.48    | 74.18      |
| 12                  | 43        | 14.05   | 88.24      |
| 13                  | 28        | 9.15    | 97.39      |
| 14                  | 8         | 2.61    | 100        |
| Total               | 306       | 100     |            |

Note. This is based on data from IFLS 4 (2007) wave. Information on the age started to work is missing for six child workers.

Table S3: Distribution of age at which children started to work by region and province

| Provinces        | Mean Age | SD  |
|------------------|----------|-----|
| <b>Region</b>    |          |     |
| Urban            | 9.7      | 2.4 |
| Rural            | 9.6      | 2.6 |
| <b>Province</b>  |          |     |
| North Sumarta    | 8.6      | 1.7 |
| West Sumarta     | 9.6      | 2.0 |
| South Sumarta    | 10.1     | 2.2 |
| Lampung          | 10.4     | 1.0 |
| Jakarta          | 10.0     | 2.3 |
| West Java        | 9.4      | 3.1 |
| Central Java     | 9.9      | 2.2 |
| Yogyakarta       | 10.8     | 2.3 |
| East Java        | 10.0     | 1.9 |
| Bali             | 9.4      | 3.2 |
| West Nusa        | 9.7      | 1.9 |
| South Kalimantan | 11.7     | 1.4 |
| South Sulawesi   | 8.8      | 5.4 |

Note. Mean age and SD denote the average age at which children started to work and its standard deviation respectively.

Table S4: Average minimum wage by province

| Province         | Average minimum wage |
|------------------|----------------------|
| North Sumarta    | 6.23                 |
| West Sumarta     | 5.60                 |
| South Sumarta    | 5.31                 |
| Lampung          | 4.36                 |
| Jakarta          | 6.82                 |
| West Java        | 4.22                 |
| Central Java     | 4.10                 |
| Yogyakarta       | 4.15                 |
| East Java        | 3.54                 |
| Bali             | 4.68                 |
| West Nusa        | 4.89                 |
| South Kalimantan | 5.55                 |
| South Sulawesi   | 5.36                 |

Note. The average minimum wage denotes the average of the provincial legislated minimum wage for the period under consideration, expressed in hundreds of thousand rupiahs.

Table S5: Variable Description

| Variables                                 | Description                                                                                                                               |
|-------------------------------------------|-------------------------------------------------------------------------------------------------------------------------------------------|
| Mental health score                       | The mental health score based on CES-D-10 scale                                                                                           |
| Child work                                | =1 if ever worked for wages or in family business as a child (past month)                                                                 |
| <b>Demographics</b>                       |                                                                                                                                           |
| Female                                    | =1 if the individual is a female                                                                                                          |
| Age                                       | Age of the individual                                                                                                                     |
| Urban                                     | =1 if the household is in an urban area                                                                                                   |
| <b>Marital status</b>                     |                                                                                                                                           |
| Married                                   | =1 if married or cohabiting                                                                                                               |
| Divorced                                  | =1 if divorced, separated or widowed                                                                                                      |
| Unmarried*                                | =1 if unmarried                                                                                                                           |
| <b>Work status</b>                        |                                                                                                                                           |
| Employed                                  | =1 if working/helping to get an income                                                                                                    |
| Unemployed                                | =1 if looking for a job or unemployed                                                                                                     |
| Schooling                                 | =1 if a student                                                                                                                           |
| House keeping                             | =1 if a house keeper                                                                                                                      |
| Retired or sick*                          | =1 if retired, sick or disable                                                                                                            |
| <b>Proxies for contemporaneous income</b> |                                                                                                                                           |
| lnpce                                     | Logarithm of monthly per capita expenditure in 2014                                                                                       |
| Dependency ratio                          | The ratio of the number of household members aged below 14 and above 65 years to the number of working members aged 15 - 64 years in 2014 |
| Toilet river/land/sea                     | =1 if the household does not have proper toilet facilities in 2014                                                                        |
| Cook firewood                             | =1 if the household uses firewood as the main source of energy for cooking in 2014                                                        |
| <b>Proxies for past income</b>            |                                                                                                                                           |
| lnpce 2007                                | Logarithm of monthly per capita expenditure in 2007                                                                                       |
| Dependency ratio 2007                     | The ratio of the number of household members aged below 14 and above 65 years to the number of working members aged 15 - 64 years in 2007 |
| Toilet river/land/sea 2007                | =1 if the household does not have proper toilet facilities in 2007                                                                        |
| Cook firewood 2007                        | =1 if the household uses firewood as the main source of energy for cooking in 2007                                                        |
| <b>Body mass index</b>                    |                                                                                                                                           |
| Under weight                              | =1 if the BMI is less than 18.5 kg/m <sup>2</sup>                                                                                         |
| Over weight                               | =1 if the BMI index is between 23.0 to 25.0 kg/m <sup>2</sup>                                                                             |
| Obese                                     | =1 if the BMI index is above 25.0 kg/m <sup>2</sup>                                                                                       |
| Normal weight*                            | =1 if the BMI index is between 18.5 to 22.9 kg/m <sup>2</sup>                                                                             |
| <b>Childhood adverse events</b>           |                                                                                                                                           |
| Child health                              | =1 if the health was fair or poor during childhood                                                                                        |
| Bedridden                                 | =1 if confined to bed or home for one or more months during childhood                                                                     |
| Child hunger                              | =1 if experienced hunger in childhood                                                                                                     |
| Parent smoke                              | =1 if any of the parents used to smoke at age 12                                                                                          |
| Parent alcohol                            | =1 if any of the parents used to drink heavily at age 12                                                                                  |
| Parent mental problems                    | =1 if any of the parents had mental problems at age 12                                                                                    |
| Parents unmarried                         | =1 if the parents were no longer married at age 12                                                                                        |
| <b>Stressful events</b>                   |                                                                                                                                           |
| Accident injury                           | =1 if an injury caused by an accident limits the daily activities                                                                         |
| Fall injury                               | =1 if an injury caused by a fall limits the daily activities                                                                              |
| Natural disasters (ND)                    | =1 if the household has experienced any type of a disaster during the last 5 years                                                        |
| Injuries                                  | =1 if the disaster was severe enough to cause death, injury during the last 5 years to household members                                  |
| Disruption (dis)                          | =1 if the household has experienced events that caused economic disruptions                                                               |
| Crime                                     | =1 if a household member has been a victim of crime during the past year                                                                  |

Table S5. *continued.*

**Religiosity and social capital**

|                         |                                                                                                                                               |
|-------------------------|-----------------------------------------------------------------------------------------------------------------------------------------------|
| Religious               | =1 if the individual is very religious or somewhat religious                                                                                  |
| Willing to help         | =1 if willing to help people in village if needed                                                                                             |
| Community participation | The percentage of community activities participated within the past year out of total number of community activities known to the respondent. |

**Physical health status**

|                             |                                               |
|-----------------------------|-----------------------------------------------|
| Self reported health status | =1 if the reported health status is 'healthy' |
|-----------------------------|-----------------------------------------------|

**Physical activity**

|                   |                                                      |
|-------------------|------------------------------------------------------|
| Moderate Activity | Number of days per week engaged in moderate activity |
| Vigorous Activity | Number of days per week engaged in vigorous activity |
| Walking Activity* | Number of days per week engaged in walking activity  |

**Habits and behavioral factors**

|             |                                                             |
|-------------|-------------------------------------------------------------|
| Smoke       | =1 if ever smoked or chewed tobacco                         |
| Still smoke | =1 if it is a current smoker                                |
| Fruits      | =1 if consumed fruits more than 2 days in the last week     |
| Vegetables  | =1 if consumed vegetables more than 2 days in the last week |
| Soft drinks | =1 if consumed soft drinks in the last week                 |

**Provincial dummies**

Seperate indicator variables for each of the following provinces:  
 North Sumarta, West Sumarta, South Sumarta, Lampung, Jakarta,  
 West Java, Central Java, Yogyakarta, East Java, Bali, West Nusa  
 Tenggara, South Sulawesi and South Kalimantan

**Instrument**

|              |                                                                        |
|--------------|------------------------------------------------------------------------|
| Minimum wage | The provincial legislated minimum wage in hundreds of thousand rupiahs |
|--------------|------------------------------------------------------------------------|

---

Variables marked with \* indicates the reference group.

Figure S1: Incidence of child labour by age

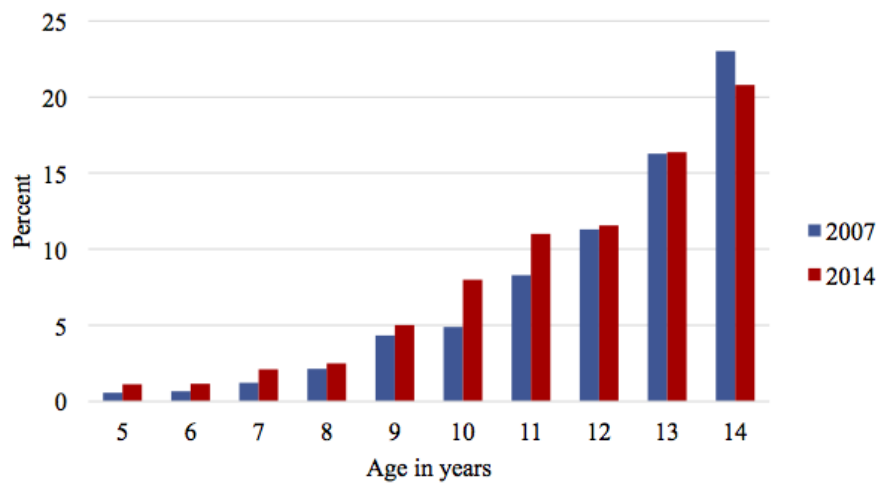

Note: This figure is based on data from the total sample of children between 5 to 14 years old in IFLS 4 (2007) and IFLS 5 (2014) waves.

Table S6: Summary Statistics

| Variables                                 | Full Sample<br>N=3,842 |       | Child workers<br>N=312 |       | Non child workers<br>N=3,530 |       | Mean<br>Difference |
|-------------------------------------------|------------------------|-------|------------------------|-------|------------------------------|-------|--------------------|
|                                           | Mean                   | SD    | Mean                   | SD    | Mean                         | SD    |                    |
| Mental health score (min=0, max=26)       | 7.46                   | 4.63  | 8.08                   | 4.88  | 7.41                         | 4.60  | 0.68***            |
| <b>Demographics</b>                       |                        |       |                        |       |                              |       |                    |
| Female (=1)                               | 0.50                   | 0.50  | 0.51                   | 0.50  | 0.50                         | 0.50  | 0.01               |
| Age (min=14, max=24)                      | 17.62                  | 2.06  | 18.86                  | 1.88  | 17.51                        | 2.04  | 1.35***            |
| Urban (=1)                                | 0.64                   | 0.48  | 0.56                   | 0.50  | 0.64                         | 0.48  | -0.09***           |
| <b>Marital status</b>                     |                        |       |                        |       |                              |       |                    |
| Married (=1)                              | 0.10                   | 0.30  | 0.16                   | 0.37  | 0.09                         | 0.29  | 0.06***            |
| Divorced (=1)                             | 0.01                   | 0.08  | 0.00                   | 0.05  | 0.01                         | 0.08  | 0.00               |
| Unmarried (=1)                            | 0.89                   | 0.31  | 0.84                   | 0.37  | 0.90                         | 0.30  | -0.06***           |
| <b>Work status</b>                        |                        |       |                        |       |                              |       |                    |
| Employed (=1)                             | 0.24                   | 0.43  | 0.42                   | 0.50  | 0.23                         | 0.42  | 0.20***            |
| Unemployed (=1)                           | 0.11                   | 0.32  | 0.12                   | 0.32  | 0.11                         | 0.32  | 0.01               |
| Schooling (=1)                            | 0.54                   | 0.50  | 0.33                   | 0.47  | 0.56                         | 0.50  | -0.22***           |
| House keeping (=1)                        | 0.10                   | 0.30  | 0.11                   | 0.31  | 0.10                         | 0.30  | 0.01               |
| Retired or sick (=1)                      | 0.01                   | 0.08  | 0.01                   | 0.09  | 0.01                         | 0.08  | 0.00               |
| <b>Proxies for contemporaneous income</b> |                        |       |                        |       |                              |       |                    |
| lnpce (min=11, max=17)                    | 13.73                  | 0.75  | 13.64                  | 0.71  | 13.74                        | 0.75  | -0.10**            |
| Dependency ratio (min=0, max=4)           | 0.35                   | 0.38  | 0.33                   | 0.34  | 0.35                         | 0.38  | -0.02              |
| Toilet river/land/sea (=1)                | 0.07                   | 0.26  | 0.11                   | 0.31  | 0.07                         | 0.26  | 0.04***            |
| Cook firewood (=1)                        | 0.19                   | 0.39  | 0.26                   | 0.44  | 0.18                         | 0.38  | 0.08***            |
| <b>Proxies for past income</b>            |                        |       |                        |       |                              |       |                    |
| lnpce 2007 (min=10, max=16)               | 12.81                  | 0.64  | 12.75                  | 0.63  | 12.81                        | 0.64  | -0.06*             |
| Dependency ratio 2007 (min=0, max=5)      | 1.07                   | 0.69  | 1.21                   | 0.83  | 1.06                         | 0.68  | 0.06***            |
| Toilet river/land/sea 2007 (=1)           | 0.18                   | 0.38  | 0.30                   | 0.46  | 0.17                         | 0.38  | 0.13***            |
| Cook firewood 2007 (=1)                   | 0.39                   | 0.49  | 0.56                   | 0.50  | 0.38                         | 0.48  | 0.18***            |
| <b>Body mass index</b>                    |                        |       |                        |       |                              |       |                    |
| Under weight (=1)                         | 0.29                   | 0.45  | 0.20                   | 0.40  | 0.30                         | 0.46  | -0.10***           |
| Over weight (=1)                          | 0.09                   | 0.28  | 0.13                   | 0.34  | 0.08                         | 0.28  | 0.05***            |
| Obese (=1)                                | 0.11                   | 0.31  | 0.13                   | 0.33  | 0.10                         | 0.31  | 0.02               |
| Normal weight (=1)                        | 0.48                   | 0.50  | 0.50                   | 0.50  | 0.48                         | 0.50  | 0.03               |
| <b>Childhood adverse events</b>           |                        |       |                        |       |                              |       |                    |
| Child health (=1)                         | 0.32                   | 0.47  | 0.39                   | 0.49  | 0.32                         | 0.46  | 0.08***            |
| Bedridden (=1)                            | 0.06                   | 0.24  | 0.08                   | 0.27  | 0.06                         | 0.24  | 0.02               |
| Child hunger (=1)                         | 0.04                   | 0.18  | 0.05                   | 0.21  | 0.03                         | 0.18  | 0.01               |
| Parent smoke (=1)                         | 0.67                   | 0.47  | 0.66                   | 0.47  | 0.67                         | 0.47  | -0.01              |
| Parent alcohol (=1)                       | 0.05                   | 0.21  | 0.11                   | 0.31  | 0.04                         | 0.20  | 0.06***            |
| Parent mental problems (=1)               | 0.00                   | 0.05  | 0.00                   | 0.00  | 0.00                         | 0.05  | 0.00               |
| Parents unmarried (=1)                    | 0.14                   | 0.35  | 0.13                   | 0.35  | 0.14                         | 0.35  | -0.01              |
| <b>Stressful events</b>                   |                        |       |                        |       |                              |       |                    |
| Accident injury (=1)                      | 0.09                   | 0.29  | 0.11                   | 0.31  | 0.09                         | 0.29  | 0.01               |
| Fall injury (=1)                          | 0.08                   | 0.27  | 0.06                   | 0.24  | 0.08                         | 0.27  | -0.02              |
| Natural disasters (ND) (=1)               | 0.21                   | 0.41  | 0.21                   | 0.41  | 0.21                         | 0.41  | 0.00               |
| Injuries (=1)                             | 0.03                   | 0.17  | 0.03                   | 0.17  | 0.03                         | 0.17  | 0.00               |
| Disruption (dis) (=1)                     | 0.18                   | 0.39  | 0.19                   | 0.39  | 0.18                         | 0.39  | 0.01               |
| Crime (=1)                                | 0.06                   | 0.24  | 0.07                   | 0.26  | 0.06                         | 0.23  | 0.01               |
| <b>Religiosity and social capital</b>     |                        |       |                        |       |                              |       |                    |
| Religious (=1)                            | 0.67                   | 0.47  | 0.69                   | 0.46  | 0.67                         | 0.47  | 0.02               |
| Willing to help (=1)                      | 0.99                   | 0.10  | 0.99                   | 0.08  | 0.99                         | 0.11  | 0.00               |
| Community participation (min=0, max=100)  | 25.14                  | 27.56 | 30.85                  | 30.24 | 24.63                        | 27.25 | 6.22***            |
| <b>Physical health status</b>             |                        |       |                        |       |                              |       |                    |

Table S8: Mental health distribution

| Quantile | Observations | Mean  | SD   | Minimum | Maximum |
|----------|--------------|-------|------|---------|---------|
| 0.25     | 1,177        | 2.49  | 1.34 | 1       | 4       |
| 0.50     | 964          | 5.99  | 0.78 | 5       | 7       |
| 0.75     | 940          | 9.39  | 1.12 | 8       | 11      |
| 0.90     | 446          | 12.83 | 0.82 | 12      | 14      |

Table S9: Robustness check: Different model specifications

|                                         | 0.25 quantile | 0.50 quantile | 0.75 quantile | 0.90 quantile |
|-----------------------------------------|---------------|---------------|---------------|---------------|
| <b>Panel A (Demographics + FE)</b>      |               |               |               |               |
| Child work                              | -0.448**      | 0.760**       | 1.000***      | 0.639***      |
|                                         | (0.207)       | (0.364)       | (0.000)       | (0.031)       |
| Observations                            | 4,173         | 4,173         | 4,173         | 4,173         |
| <b>Panel B (+ Income proxies)</b>       |               |               |               |               |
| Child work                              | -0.144        | 0.953***      | 0.641***      | 0.660***      |
|                                         | (0.168)       | (0.288)       | (0.118)       | (0.029)       |
| Observations                            | 3,985         | 3,985         | 3,985         | 3,985         |
| <b>Panel C (+ Childhood adversity)</b>  |               |               |               |               |
| Child work                              | -0.046        | 0.781***      | 0.860***      | 0.244***      |
|                                         | (0.047)       | (0.118)       | (0.065)       | (0.033)       |
| Observations                            | 3,842         | 3,842         | 3,842         | 3,842         |
| <b>Panel D (Original specification)</b> |               |               |               |               |
| Child work                              | 0.035         | 0.544***      | 0.874***      | 0.332***      |
|                                         | (0.048)       | (0.044)       | (0.080)       | (0.044)       |
| Observations                            | 3,842         | 3,842         | 3,842         | 3,842         |

Notes: \*\*\* p<0.01, \*\* p<0.05, \* p<0.1. Robust standard errors in parenthesis, clustered at individual level using the Markov Chain Carlo algorithm (MCMC).

Table S10: Robustness check: Using parental mental health in 2007 as an additional control variable

|              | 0.25 quantile | 0.50 quantile | 0.75 quantile | 0.90 quantile |
|--------------|---------------|---------------|---------------|---------------|
| Child work   | -0.110        | 0.749***      | 0.739***      | 0.450***      |
|              | (0.071)       | (0.073)       | (0.034)       | (0.036)       |
| Observations | 3,842         | 3,842         | 3,842         | 3,842         |

Notes: \*\*\* p<0.01, \*\* p<0.05, \* p<0.1. Robust standard errors in parenthesis, clustered at individual level using the Markov Chain Carlo algorithm (MCMC). All regressions include the full set of control variables denoting demographics, income proxies, adverse and stressful events, religiosity and social capital, physical health status, habits and behavioural factors, *parental mental health in 2007* and provincial fixed effects.
